# Supplementary material for: Retinal microvascular network geometry and cognitive abilities in community-dwelling older people: The Lothian Birth Cohort 1936 study
Source: PubMed Central journal article supplement (PMC5530803; doi:10.1136/bjophthalmol-2016-309017), 2017-06-22
Supplement: bjophthalmol-2016-309017supp001.pdf [file bjophthalmol-2016-309017supp001.pdf]

Supplemental Table S1. Domain Score Composition, Factor Loadings from Principal Components Analysis of Cognitive Ability Domains and Cronbach's alpha reliabilities

| Domain       |                                                                                                                                                                                                                                   | Unrotated factor loadings                                                                                                                                                                                                                                                      | % variance | Cronbach's $\alpha$ |
|--------------|-----------------------------------------------------------------------------------------------------------------------------------------------------------------------------------------------------------------------------------|--------------------------------------------------------------------------------------------------------------------------------------------------------------------------------------------------------------------------------------------------------------------------------|------------|---------------------|
| Visuospatial |                                                                                                                                                                                                                                   |                                                                                                                                                                                                                                                                                | 53.9       | .54                 |
|              | The visuospatial factor was derived from Matrix Reasoning and Block Design scores from WAIS-III and Spatial Span Forward and Spatial Span Backward from the Wechsler Memory Scale-Third Edition (WMS-III).[1]                     | Block design<br>Spatial span backward<br>Matrix reasoning<br>Spatial span forward                                                                                                                                                                                              |            |                     |
|              |                                                                                                                                                                                                                                   | .80<br>.72<br>.72<br>.69                                                                                                                                                                                                                                                       |            |                     |
| Speed        |                                                                                                                                                                                                                                   |                                                                                                                                                                                                                                                                                | 57.7       | .56                 |
|              | The processing speed factor was derived from scores on Symbol Search and Digit Symbol tests from the Wechsler Adult Intelligence Scale-Third Edition (WAIS-III)[2], visual Inspection Time, and 4-Choice Reaction Time mean.[3,4] | Digit symbol coding<br>Symbol search<br>Inspection time<br>4-Choice reaction time                                                                                                                                                                                              |            |                     |
|              |                                                                                                                                                                                                                                   | .83<br>.81<br>-.77<br>.61                                                                                                                                                                                                                                                      |            |                     |
| Memory       |                                                                                                                                                                                                                                   |                                                                                                                                                                                                                                                                                | 55.7       | .54                 |
|              | The memory factor was derived from Logical Memory, Digit Span Backwards and Verbal Paired Associates from the WMS-III.                                                                                                            | Logical Memory<br>Verbal Paired Associates<br>Digit Span Backwards                                                                                                                                                                                                             |            |                     |
|              |                                                                                                                                                                                                                                   | .81<br>.80<br>.62                                                                                                                                                                                                                                                              |            |                     |
| Crystallized |                                                                                                                                                                                                                                   |                                                                                                                                                                                                                                                                                | 74.7       | .74                 |
|              | The crystallized cognitive ability factor was derived from scores on the National Adult Reading Test (NART),[5] the Wechsler Test of Adult Reading (WTAR),[6] and Verbal Fluency.[7]                                              | NART<br>WTAR<br>Verbal Fluency                                                                                                                                                                                                                                                 |            |                     |
|              |                                                                                                                                                                                                                                   | .94<br>.94<br>.70                                                                                                                                                                                                                                                              |            |                     |
| G            |                                                                                                                                                                                                                                   |                                                                                                                                                                                                                                                                                | 35.4       | .80                 |
|              | A general cognitive ability factor ( <i>g</i> ) was derived from all 14 subtests on which other domain scores were based.                                                                                                         | WTAR<br>NART<br>Digit Symbol coding<br>Symbol search<br>Block design<br>Matrix reasoning<br>Verbal fluency<br>4-Choice reaction time<br>Digit span backwards<br>Logical memory<br>Verbal paired associates<br>Inspection time<br>Spatial span backward<br>Spatial span forward |            |                     |
|              |                                                                                                                                                                                                                                   | .74<br>.73<br>.70<br>.70<br>.65<br>.65<br>.58<br>-.55<br>.55<br>.53<br>.49<br>.49<br>.47<br>.44                                                                                                                                                                                |            |                     |

Note. Visuospatial=Visuospatial ability; Speed = information processing speed; Memory = memory ability; Crystallized=Crystallized ability; G=general cognitive ability; WTAR=Wechsler Test of Adult Reading; NART=National Adult Reading Test.

Supplemental Table S2. Correlations between Retinal Vascular Parameters and Cognitive Ability Outcomes

|               | 1.      | 2.      | 3.      | 4.   | 5.   | 6.     | 7.      | 8.     | 9.     | 10.    | 11.    | 12.  | 13.  | 14.    | 15.   | 16.    | 17.    | 18.    | 19.    | 20.    | 21.   | 22. |  |
|---------------|---------|---------|---------|------|------|--------|---------|--------|--------|--------|--------|------|------|--------|-------|--------|--------|--------|--------|--------|-------|-----|--|
| 1. CRAE       | -       |         |         |      |      |        |         |        |        |        |        |      |      |        |       |        |        |        |        |        |       |     |  |
| 2. CRVE       | .51***  | -       |         |      |      |        |         |        |        |        |        |      |      |        |       |        |        |        |        |        |       |     |  |
| 3. AVR        | .51***  | -.47*** | -       |      |      |        |         |        |        |        |        |      |      |        |       |        |        |        |        |        |       |     |  |
| 4. LDRa       | -.09    | -.01    | -.08    | -    |      |        |         |        |        |        |        |      |      |        |       |        |        |        |        |        |       |     |  |
| 5. LDRv       | -.11*   | -.10*   | -.01    | .11  | -    |        |         |        |        |        |        |      |      |        |       |        |        |        |        |        |       |     |  |
| 6. JEa        | .24***  | .03     | .21***  | .04  | .05  | -      |         |        |        |        |        |      |      |        |       |        |        |        |        |        |       |     |  |
| 7. JEv        | -.04    | .19***  | .23***  | .04  | .09  | .05    | -       |        |        |        |        |      |      |        |       |        |        |        |        |        |       |     |  |
| 8. FDa        | .19***  | .09*    | .11**   | .04  | .03  | .03    | .04     | -      |        |        |        |      |      |        |       |        |        |        |        |        |       |     |  |
| 9. FDv        | -.03    | .10**   | -.13**  | .10* | .07  | .03    | -.08    | .33*** | -      |        |        |      |      |        |       |        |        |        |        |        |       |     |  |
| 10. Num1stBa  | .14***  | .07     | .08*    | .03  | .01  | -.06   | .07     | .50*** | .18*** | -      |        |      |      |        |       |        |        |        |        |        |       |     |  |
| 11. Num1stBv  | -.01    | .13***  | -.13*** | .004 | .09  | .05    | -.01    | .20*** | .45*** | .22*   | -      |      |      |        |       |        |        |        |        |        |       |     |  |
| 12. BCa       | -.26*** | -.02    | -.23*** | -.03 | -.09 | .90*** | -.10*   | -.08*  | -.05   | .07    | -.08*  | -    |      |        |       |        |        |        |        |        |       |     |  |
| 13. BCv       | .07     | -.20*** | .27***  | -.09 | -.07 | -.04   | -.87*** | -.05   | .07    | -.06   | .07    | .07  | -    |        |       |        |        |        |        |        |       |     |  |
| 14. TORTa     | .10**   | .08*    | .03     | .11* | .05  | .01    | .04     | .28*** | .15*** | .15*** | .15*** | -.02 | -.04 | -      |       |        |        |        |        |        |       |     |  |
| 15. TORTv     | -.002   | .06     | -.06    | .05  | .09  | -.004  | -.04    | .18*** | .29*** | .09*   | .20*** | -.01 | .05  | .32*** | -     |        |        |        |        |        |       |     |  |
| 16. Visuo     | -.05    | .01     | -.07    | .05  | -.04 | -.06   | .004    | .01    | .01    | -.01   | .003   | .06  | -.06 | .04    | -.01  | -      |        |        |        |        |       |     |  |
| 17. Speed     | -.02    | -.07    | .05     | -.01 | -.09 | -.02   | .01     | .04    | .01    | -.03   | -.04   | -.01 | -.04 | .04    | -.01  | .54*** | -      |        |        |        |       |     |  |
| 18. Memory    | -.01    | .01     | -.02    | .01  | -.02 | -.02   | .01     | -.09*  | -.02   | -.06   | .01    | .03  | -.03 | -.01   | -.08* | .38*** | .37*** | -      |        |        |       |     |  |
| 19. Cryst     | .001    | -.03    | .03     | -.05 | .02  | -.01   | -.003   | .03    | -.02   | -.07   | -.002  | -.01 | .01  | .04    | -.09* | .38*** | .47*** | .53*** | -      |        |       |     |  |
| 20. G         | -.02    | -.02    | -.01    | -.01 | -.07 | -.03   | -.01    | -.02   | -.004  | -.05   | -.01   | .02  | -.02 | .04    | -.05  | .76*** | .81*** | .69*** | .78*** | -      |       |     |  |
| 21. Age 11 IQ | -.01    | -.03    | .02     | -.03 | .02  | -.004  | .04     | -.07   | -.08*  | -.02   | <.001  | -.01 | -.02 | -.01   | -.10* | .43*** | .45*** | .51*** | .68*** | .69*** | -.000 | -   |  |
| 22. IQ change | -.04    | -.03    | -.01    | -.01 | -.04 | -.11** | -.05    | -.03   | -.04   | -.05   | -.06   | .10* | .03  | -.01   | -.06  | .33*** | .28*** | .26*** | .26*** | .37*** | .000  | -   |  |

Note. Visuo=Visuospatial ability; Speed = information processing speed; Memory = memory ability; Cryst=Crystallized ability; G=general cognitive ability.

Retinal predictor abbreviations explained in Table 1.

\*  $p < .05$ . \*\*  $p < .01$ . \*\*\*  $p < .001$

Supplemental Table S3. Retinal characteristics of Study Population with Images of Sufficient Quality for Analysis

| Retinal parameter                                   | N   | Mean (SD)    | Min   | Max  |
|-----------------------------------------------------|-----|--------------|-------|------|
| CRAE                                                | 683 | 130 (12.2)   | 89.9  | 179  |
| CRVE                                                | 683 | 188 (17.2)   | 138   | 273  |
| AVR                                                 | 683 | 0.70 (.06)   | 0.49  | 0.89 |
| Length diameter ratio arteriole                     | 418 | 15.8 (8.65)  | 1.40  | 72.3 |
| Length diameter ratio venule                        | 419 | 13.0 (8.98)  | 0.87  | 71.1 |
| Junctional exponent deviation arteriole             | 666 | -0.34 (0.39) | -1.26 | 0.79 |
| Junctional exponent deviation venule                | 673 | 0.02 (0.40)  | -0.99 | 0.83 |
| Fractal dimension arteriole                         | 683 | 1.17 (0.05)  | 0.99  | 1.31 |
| Fractal dimension venules                           | 683 | 1.14 (0.05)  | 0.99  | 1.28 |
| Number of first branching arteriole                 | 683 | 2.95 (1.22)  | 0     | 6    |
| Number of first branching venule                    | 683 | 2.67 (1.04)  | 0     | 6    |
| Branching coefficient arteriole                     | 666 | 1.42 (0.21)  | 0.79  | 2.35 |
| Branching coefficient venule                        | 673 | 1.23 (0.17)  | 0.71  | 2.10 |
| Curvature tortuosity arteriole(x 10 <sup>-5</sup> ) | 683 | 6.79 (1.74)  | 3.70  | 16.6 |
| Curvature tortuosity venule (x 10 <sup>-5</sup> )   | 683 | 7.71 (2.17)  | 3.60  | 23.8 |

Note. SD=standard deviation. Retinal predictor abbreviations explained in Table 1.

Supplemental Table S4. Standardised Coefficients from Multiple Linear Regressions using Retinal Vascular Parameters to Predict Cognitive Ability in the LBC1936

| Cognitive outcome | Retinal predictor | Model 1 |           |       |             |             | Model 2 |           |       |             |             | Model 3 |           |       |             |             |                |     |
|-------------------|-------------------|---------|-----------|-------|-------------|-------------|---------|-----------|-------|-------------|-------------|---------|-----------|-------|-------------|-------------|----------------|-----|
|                   |                   | n       | $\beta^a$ | p     | Adjusted R2 | $\Delta R2$ | n       | $\beta^a$ | p     | Adjusted R2 | $\Delta R2$ | n       | $\beta^a$ | p     | Adjusted R2 | $\Delta R2$ | FDR adjusted p |     |
| G                 | CRAE              | 546     | -.003     | .95   | .024        | .000        | 546     | .012      | .79   | .037        | .030        | 546     | -.001     | .97   | .52         | .47         | .97            |     |
|                   | CRVE              | 546     | .010      | .81   | .024        | .000        | 546     | .020      | .63   | .038        | .030        | 546     | .010      | .74   | .52         | .47         | .85            |     |
|                   | AVR               | 546     | -.017     | .69   | .024        | .000        | 546     | -.013     | .76   | .037        | .029        | 546     | -.013     | .67   | .52         | .47         | .84            |     |
|                   | JEa               | 533     | -.048     | .26   | .026        | .002        | 533     | -.056     | .20   | .039        | .029        | 533     | -.026     | .38   | .53         | .45         | .84            |     |
|                   | JEv               | 539     | .001      | .98   | .021        | .000        | 539     | -.006     | .89   | .034        | .029        | 539     | -.035     | .25   | .52         | .48         | .84            |     |
|                   | FDa               | 546     | -.028     | .51   | .024        | .001        | 546     | -.007     | .88   | .037        | .029        | 546     | .014      | .65   | .52         | .48         | .84            |     |
|                   | FDv               | 546     | -.038     | .37   | .025        | .001        | 546     | -.023     | .58   | .038        | .029        | 546     | .016      | .61   | .52         | .47         | .84            |     |
|                   | TORTa             | 546     | .016      | .70   | .024        | .000        | 546     | .025      | .56   | .038        | .030        | 546     | .014      | .64   | .52         | .47         | .84            |     |
|                   | TORTv             | 546     | -.075     | .075† | .029        | .006        | 546     | -.067     | .12   | .042        | .028        | 546     | .002      | .96   | .52         | .47         | .97            |     |
|                   | LDRa              | 334     | .014      | .80   | .022        | .000        | 334     | .006      | .92   | .045        | .049        | 334     | .033      | .38   | .54         | .46         | .84            |     |
|                   | LDRv              | 334     | -.071     | .20   | .019        | .005        | 334     | -.071     | .20   | .041        | .048        | 334     | -.079     | .038* | .54         | .49         | .57            |     |
|                   | BCa               | 533     | .060      | .16   | .028        | .004        | 533     | .063      | .14   | .040        | .028        | 533     | .037      | .22   | .53         | .48         | .84            |     |
|                   | BCv               | 539     | -.033     | .44   | .022        | .001        | 533     | -.025     | .57   | .035        | .029        | 533     | -.016     | .59   | .52         | .48         | .84            |     |
|                   | Num1stBa          | 546     | -.047     | .26   | .026        | .002        | 546     | -.039     | .35   | .039        | .029        | 546     | -.040     | .18   | .52         | .47         | .84            |     |
|                   | Num1stBv          | 546     | -.009     | .84   | .024        | .000        | 546     | .002      | .96   | .037        | .029        | 546     | -.013     | .65   | .52         | .48         | .84            |     |
|                   | Visuospatial      | CRAE    | 567       | -.019 | .64         | .049        | .000    | 567       | -.002 | .95         | .079        | .045    | 567       | -.008 | .83         | .28         | .20            | .92 |
|                   |                   | CRVE    | 567       | .021  | .61         | .049        | .000    | 567       | .031  | .45         | .080        | .046    | 567       | .031  | .39         | .29         | .20            | .62 |
|                   |                   | AVR     | 567       | -.048 | .25         | .051        | .002    | 567       | -.040 | .33         | .081        | .045    | 567       | -.043 | .24         | .9          | .20            | .62 |
|                   |                   | JEa     | 553       | -.052 | .22         | .054        | .003    | 553       | -.059 | .15         | .083        | .044    | 553       | -.040 | .27         | .29         | .20            | .62 |
| JEv               |                   | 559     | .007      | .86   | .046        | .000        | 559     | -.002     | .95   | .075        | .044        | 559     | -.021     | .57   | .28         | .20         | .71            |     |
| FDa               |                   | 567     | -.008     | .85   | .048        | .000        | 567     | .015      | .71   | .079        | .045        | 567     | .033      | .36   | .29         | .21         | .62            |     |
| FDv               |                   | 567     | -.019     | .65   | .049        | .000        | 567     | .001      | .98   | .079        | .045        | 567     | .027      | .46   | .28         | .21         | .62            |     |
| TORTa             |                   | 567     | .021      | .60   | .049        | .000        | 567     | .034      | .40   | .080        | .046        | 567     | .028      | .44   | .28         | .20         | .62            |     |
| TORTv             |                   | 567     | -.032     | .44   | .049        | .001        | 567     | -.018     | .66   | .080        | .045        | 567     | .032      | .38   | .29         | .20         | .62            |     |
| LDRa              |                   | 348     | .077      | .14   | .056        | .006        | 348     | .073      | .16   | .080        | .048        | 348     | .092      | .044* | .29         | .21         | .62            |     |
| LDRv              |                   | 347     | -.046     | .39   | .033        | .002        | 347     | -.045     | .40   | .059        | .051        | 347     | -.053     | .25   | .31         | .25         | .62            |     |
| BCa               |                   | 553     | .070      | .095† | .056        | .005        | 553     | .073      | .077† | .085        | .044        | 553     | .056      | .12   | .29         | .20         | .62            |     |
| BCv               |                   | 559     | -.059     | .16   | .049        | .003        | 559     | -.046     | .26   | .078        | .043        | 559     | -.043     | .23   | .28         | .20         | .62            |     |
| Num1stBa          |                   | 567     | -.010     | .81   | .049        | .000        | 567     | .004      | .92   | .079        | .045        | 567     | .005      | .89   | .28         | .20         | .92            |     |
| Num1stBv          |                   | 567     | .006      | .89   | .048        | .000        | 567     | .014      | .73   | .079        | .045        | 567     | .003      | .92   | .28         | .20         | .92            |     |
| Speed             |                   | CRAE    | 559       | -.024 | .56         | .025        | .001    | 559       | -.002 | .97         | .051        | .041    | 559       | -.009 | .81         | .25         | .20            | .81 |
|                   |                   | CRVE    | 559       | -.046 | .27         | .027        | .002    | 559       | .030  | .47         | .052        | .040    | 559       | -.033 | .38         | .25         | .20            | .81 |
|                   |                   | AVR     | 559       | .021  | .62         | .025        | .000    | 559       | .027  | .52         | .052        | .042    | 559       | .025  | .51         | .25         | .20            | .81 |
|                   |                   | JEa     | 546       | -.033 | .43         | .027        | .001    | 546       | -.043 | .30         | .052        | .040    | 546       | -.026 | .48         | .26         | .21            | .81 |
|                   | JEv               | 552     | .011      | .80   | .022        | .000        | 552     | -.002     | .96   | .047        | .040        | 552     | -.020     | .59   | .25         | .21         | .81            |     |
|                   | FDa               | 559     | .036      | .39   | .026        | .001        | 559     | .055      | .19   | .054        | .043        | 559     | .070      | .060† | .26         | .20         | .45            |     |
|                   | FDv               | 559     | -.028     | .51   | .025        | .001        | 559     | -.014     | .74   | .051        | .041        | 559     | .014      | .71   | .25         | .20         | .81            |     |
|                   | TORTa             | 559     | .013      | .76   | .025        | .000        | 559     | .020      | .62   | .052        | .042        | 559     | .012      | .75   | .25         | .20         | .81            |     |
|                   | TORTv             | 559     | -.037     | .38   | .026        | .001        | 559     | -.025     | .55   | .052        | .041        | 559     | .022      | .56   | .25         | .20         | .81            |     |
|                   | LDRa              | 345     | .014      | .80   | .019        | .000        | 345     | .004      | .95   | .053        | .059        | 345     | .015      | .76   | .26         | .21         | .81            |     |
|                   | LDRv              | 342     | -.11      | .039* | .021        | .012        | 342     | -.12      | .032* | .094        | .060        | 342     | -.12      | .012* | .31         | .25         | .18            |     |
|                   | BCa               | 546     | .034      | .42   | .027        | .001        | 546     | .043      | .32   | .052        | .040        | 546     | .028      | .46   | .26         | .21         | .81            |     |
|                   | BCv               | 552     | -.042     | .32   | .023        | .002        | 552     | -.032     | .44   | .048        | .040        | 552     | -.029     | .43   | .25         | .20         | .81            |     |
|                   | Num1stBa          | 559     | -.030     | .47   | .026        | .001        | 559     | -.020     | .63   | .052        | .041        | 559     | -.020     | .58   | .25         | .20         | .81            |     |
|                   | Num1stBv          | 559     | -.036     | .39   | .026        | .001        | 559     | -.027     | .51   | .052        | .041        | 559     | -.033     | .37   | .252        | .20         | .81            |     |
|                   | Memory            | CRAE    | 558       | -.007 | .87         | .023        | .000    | 558       | -.006 | .88         | .023        | .015    | 558       | -.014 | .71         | .25         | .23            | .81 |
|                   |                   | CRVE    | 558       | .030  | .47         | .024        | .001    | 558       | .024  | .57         | .024        | .015    | 558       | .022  | .55         | .25         | .23            | .81 |
|                   |                   | AVR     | 558       | -.040 | .35         | .025        | .002    | 558       | -.033 | .44         | .024        | .015    | 558       | -.036 | .34         | .25         | .23            | .77 |
|                   |                   | JEa     | 544       | -.030 | .48         | .021        | .001    | 544       | -.035 | .42         | .019        | .014    | 544       | -.019 | .62         | .25         | .23            | .81 |
| JEv               |                   | 550     | .029      | .50   | .023        | .001        | 550     | .030      | .48   | .024        | .016        | 550     | .014      | .71   | .27         | .22         | .81            |     |
| FDa               |                   | 558     | -.087     | .039* | .031        | .007        | 558     | -.080     | .059† | .029        | .014        | 558     | -.062     | .095† | .25         | .22         | .71            |     |
| FDv               |                   | 558     | -.020     | .64   | .024        | .000        | 558     | -.013     | .77   | .023        | .015        | 558     | .019      | .61   | .25         | .23         | .81            |     |

|              |          |     |       |        |      |      |     |       |        |       |      |     |       |       |      |      |     |  |
|--------------|----------|-----|-------|--------|------|------|-----|-------|--------|-------|------|-----|-------|-------|------|------|-----|--|
|              | TORTa    | 558 | -.040 | .34    | .025 | .002 | 558 | -.041 | .33    | .025  | .015 | 558 | -.041 | .27   | .25  | .23  | .77 |  |
|              | TORTv    | 558 | -.085 | .042*  | .031 | .007 | 558 | -.095 | .025*  | .032  | .017 | 558 | -.053 | .16   | .253 | .22  | .77 |  |
|              | LDRa     | 342 | .013  | .81    | .012 | .000 | 342 | .002  | .96    | .012  | .025 | 342 | .011  | .81   | .25  | .24  | .81 |  |
|              | LDRv     | 342 | -.008 | .88    | .015 | .000 | 342 | -.007 | .90    | .017  | .028 | 342 | -.014 | .78   | .21  | .20  | .81 |  |
|              | BCa      | 544 | .050  | .25    | .022 | .002 | 544 | .054  | .21    | .020  | .014 | 544 | .038  | .32   | .27  | .23  | .77 |  |
|              | BCv      | 550 | -.043 | .31    | .024 | .002 | 550 | -.039 | .36    | .024  | .016 | 550 | -.034 | .36   | .25  | .23  | .77 |  |
|              | Num1stBa | 558 | -.060 | .15    | .027 | .004 | 558 | -.060 | .16    | .027  | .015 | 558 | -.062 | .091† | .25  | .23  | .71 |  |
|              | Num1stBv | 558 | .019  | .65    | .024 | .000 | 558 | .024  | .57    | .024  | .016 | 558 | .017  | .65   | .25  | .23  | .81 |  |
| Crystallized |          |     |       |        |      |      |     |       |        |       |      |     |       |       |      |      |     |  |
|              | CRAE     | 570 | .003  | .94    | .026 | .000 | 570 | .002  | .96    | .022  | .012 | 570 | .007  | .81   | .54  | .51  | .90 |  |
|              | CRVE     | 570 | -.011 | .78    | .026 | .000 | 570 | -.009 | .84    | .022  | .012 | 570 | -.007 | .82   | .54  | .51  | .90 |  |
|              | AVR      | 570 | .008  | .84    | .026 | .000 | 570 | .005  | .91    | .022  | .012 | 570 | .012  | .68   | .54  | .51  | .90 |  |
|              | JEa      | 556 | -.041 | .33    | .026 | .002 | 556 | -.043 | .31    | .022  | .011 | 556 | -.009 | .77   | .54  | .51  | .90 |  |
|              | JEv      | 562 | .007  | .86    | .025 | .000 | 562 | .007  | .86    | .020  | .011 | 562 | -.022 | .45   | .54  | .51  | .90 |  |
|              | FDa      | 570 | -.028 | .50    | .027 | .001 | 570 | -.018 | .67    | .023  | .011 | 570 | .014  | .62   | .54  | .51  | .90 |  |
|              | FDv      | 570 | -.025 | .55    | .026 | .001 | 570 | -.023 | .59    | .023  | .012 | 570 | .020  | .50   | .54  | .51  | .90 |  |
|              | TORTa    | 570 | .021  | .62    | .026 | .000 | 570 | .020  | .63    | .023  | .012 | 570 | .014  | .62   | .54  | .51  | .90 |  |
|              | TORTv    | 570 | -.093 | .025*  | .034 | .009 | 570 | -.088 | .036*  | .030  | .011 | 570 | -.011 | .70   | .54  | .50  | .90 |  |
|              | LDRa     | 351 | -.027 | .60    | .031 | .001 | 351 | -.033 | .53    | .029  | .023 | 351 | -.012 | .76   | .52  | .48  | .90 |  |
|              | LDRv     | 349 | .026  | .62    | .017 | .001 | 349 | .030  | .59    | .000  | .009 | 349 | .022  | .56   | .51  | .450 | .97 |  |
|              | BCa      | 556 | .032  | .46    | .025 | .001 | 556 | .032  | .45    | .021  | .011 | 556 | -.001 | .97   | .54  | .51  | .90 |  |
|              | BCv      | 562 | .002  | .97    | .025 | .000 | 562 | .002  | .95    | .020  | .011 | 562 | .012  | .69   | .54  | .51  | .90 |  |
|              | Num1stBa | 570 | -.052 | .21    | .029 | .003 | 570 | -.046 | .27    | .025  | .011 | 570 | -.044 | .12   | .54  | .51  | .90 |  |
|              | Num1stBv | 570 | -.004 | .92    | .026 | .000 | 570 | .002  | .97    | .022  | .012 | 570 | -.006 | .84   | .54  | .51  | .90 |  |
| IQ change    |          |     |       |        |      |      |     |       |        |       |      |     |       |       |      |      |     |  |
|              | CRAE     | 567 | -.048 | .25    | .012 | .002 | 567 | -.049 | .25    | .002  | .005 | 567 | -.040 | .35   | .028 | .031 | 1   |  |
|              | CRVE     | 567 | -.052 | .22    | .013 | .003 | 567 | -.050 | .24    | .002  | .005 | 567 | -.047 | .27   | .029 | .031 | .56 |  |
|              | AVR      | 567 | -.003 | .94    | .010 | .000 | 567 | -.006 | .89    | -.001 | .005 | 567 | .001  | .98   | .026 | .032 | 1   |  |
|              | JEa      | 554 | -.12  | .006** | .022 | .013 | 554 | -.11  | .009** | .011  | .005 | 554 | -.10  | .017* | .036 | .030 | .26 |  |
|              | JEv      | 559 | -.069 | .10    | .015 | .005 | 559 | -.069 | .10    | .004  | .006 | 559 | -.073 | .083† | .031 | .032 | .42 |  |
|              | FDa      | 567 | -.032 | .44    | .011 | .001 | 567 | -.033 | .44    | .000  | .005 | 567 | -.030 | .48   | .027 | .031 | .71 |  |
|              | FDv      | 567 | -.047 | .27    | .012 | .002 | 567 | -.042 | .33    | .001  | .005 | 567 | -.044 | .30   | .054 | .032 | .56 |  |
|              | TORTa    | 567 | -.017 | .68    | .010 | .000 | 567 | -.012 | .77    | .000  | .005 | 567 | -.023 | .59   | .027 | .032 | .73 |  |
|              | TORTv    | 567 | -.044 | .30    | .012 | .002 | 567 | -.043 | .32    | .001  | .005 | 567 | -.026 | .54   | .027 | .030 | .73 |  |
|              | LDRa     | 350 | -.048 | .37    | .003 | .002 | 350 | -.050 | .36    | -.013 | .011 | 350 | -.042 | .44   | .003 | .024 | .71 |  |
|              | LDRv     | 346 | -.008 | .89    | .006 | .000 | 346 | -.017 | .76    | -.011 | .010 | 346 | -.007 | .91   | .024 | .043 | 1   |  |
|              | BCa      | 554 | .10   | .015*  | .019 | .011 | 554 | .099  | .022*  | .008  | .005 | 554 | .089  | .036* | .034 | .031 | .27 |  |
|              | BCv      | 559 | .048  | .26    | .012 | .002 | 559 | .048  | .25    | .002  | .006 | 559 | .046  | .27   | .028 | .031 | .56 |  |
|              | Num1stBa | 567 | -.052 | .21    | .013 | .003 | 567 | -.058 | .17    | .003  | .006 | 567 | -.053 | .21   | .029 | .031 | .56 |  |
|              | Num1stBv | 567 | -.048 | .25    | .012 | .002 | 567 | -.051 | .23    | .002  | .006 | 567 | -.052 | .21   | .029 | .032 | .56 |  |

*Note.* Visuospatial=Visuospatial ability; Speed = information processing speed; Memory = memory ability; Crystallized=Crystallized ability; G=general cognitive ability. Retinal predictor abbreviations explained in Table 1. Negative associations were such that increased retinal vascular measurements were related to lower cognitive ability scores at age 73 and lower relative change in IQ. Positive associations showed that increased retinal vascular measurements were related to higher cognitive ability scores at age 73, and increased IQ after age 11 or less decline in older age. Model 1 adjusted for age and sex; Model 2 adjusted for age, sex, hypertension, diabetes, cardiovascular history, stroke, current smoking status, APOE status, visual acuity, depression; Model 3 adjusted for adjusted for age, sex, hypertension, diabetes, cardiovascular history, stroke, current smoking status, APOE status, visual acuity, depression, age 11IQ, years of education and socioeconomic status.

<sup>a</sup> Data are presented as standardized beta coefficients ( $\beta$ ) reflecting change in cognitive domain score associated with an increase of 1 SD unit in retinal parameter.

\* Significant ( $p < .05$ )

\*\*Significant ( $p < .01$ )

† Trend ( $p < .01$ )

Supplemental Table S5. Standardised Coefficients from Multiple Linear Regressions using Retinal Vascular Parameters to Predict Cognitive Ability in the LBC1936 excluding participants with Diabetes

| Cognitive outcome | Retinal predictor | Model 1 |           |       |             |             | Model 2 |           |       |             |             | Model 3 |           |        |             |             |                  |
|-------------------|-------------------|---------|-----------|-------|-------------|-------------|---------|-----------|-------|-------------|-------------|---------|-----------|--------|-------------|-------------|------------------|
|                   |                   | n       | $\beta^a$ | $p$   | Adjusted R2 | $\Delta R2$ | n       | $\beta^a$ | $p$   | Adjusted R2 | $\Delta R2$ | n       | $\beta^a$ | $p$    | Adjusted R2 | $\Delta R2$ | FDR adjusted $p$ |
| G                 | CRAE              | 497     | -.011     | .80   | .030        | .000        | 497     | .011      | .82   | .040        | .026        | 497     | -.004     | .91    | .52         | .47         | .91              |
|                   | CRVE              | 497     | .005      | .90   | .030        | .000        | 497     | .023      | .60   | .041        | .026        | 497     | .016      | .61    | .52         | .47         | .83              |
|                   | AVR               | 497     | -.022     | .62   | .030        | .000        | 497     | -.018     | .69   | .062        | .026        | 497     | -.022     | .49    | .52         | .47         | .81              |
|                   | JEa               | 485     | -.052     | .24   | .039        | .003        | 485     | -.051     | .25   | .064        | .025        | 485     | -.020     | .54    | .54         | .48         | .81              |
|                   | JEv               | 490     | -.006     | .89   | .027        | .000        | 490     | -.010     | .82   | .037        | .026        | 490     | -.031     | .33    | .52         | .47         | .81              |
|                   | FDa               | 497     | -.014     | .76   | .030        | .000        | 497     | .007      | .88   | .040        | .026        | 497     | .024      | .45    | .52         | .47         | .81              |
|                   | FDv               | 497     | -.041     | .36   | .032        | .002        | 497     | -.025     | .57   | .041        | .025        | 497     | .011      | .74    | .52         | .47         | .87              |
|                   | TORTa             | 497     | .013      | .77   | .030        | .000        | 497     | .025      | .57   | .041        | .026        | 497     | .029      | .36    | .52         | .47         | .81              |
|                   | TORTv             | 497     | -.089     | .043* | .038        | .008        | 497     | .18       | .084† | .046        | .024        | 497     | .008      | .81    | .52         | .47         | .87              |
|                   | LDRa              | 304     | .031      | .58   | .030        | .001        | 304     | .032      | .57   | .056        | .051        | 304     | .051      | .20    | .52         | .46         | .81              |
|                   | LDRv              | 297     | -.084     | .14   | .029        | .007        | 297     | -.088     | .13   | .053        | .050        | 297     | -.093     | .022*  | .54         | .47         | .33              |
|                   | BCa               | 485     | .066      | .14   | .035        | .004        | 485     | .060      | .19   | .044        | .024        | 485     | .031      | .33    | .53         | .48         | .81              |
|                   | BCv               | 490     | -.041     | .36   | .029        | .002        | 490     | -.036     | .43   | .038        | .025        | 490     | -.027     | .39    | .52         | .47         | .81              |
|                   | Num1stBa          | 497     | .024      | .59   | .031        | .001        | 497     | -.028     | .53   | .041        | .025        | 497     | -.033     | .30    | .52         | .47         | .81              |
|                   | Num1stBv          | 497     | -.011     | .80   | .030        | .000        | 497     | -.004     | .93   | .040        | .026        | 497     | -.009     | .76    | .52         | .47         | .87              |
|                   | Visuospatial      | CRAE    | 513       | -.028 | .53         | .056        | .001    | 513       | -.005 | .92         | .091        | .049    | 513       | -.011  | .78         | .28         | .19              |
| CRVE              |                   | 513     | .015      | .72   | .055        | .000        | 513     | .032      | .46   | .092        | .050        | 513     | .035      | .36    | .28         | .19         | .68              |
| AVR               |                   | 513     | -.051     | .24   | .058        | .003        | 513     | -.044     | .31   | .093        | .049        | 513     | -.051     | .19    | .29         | .19         | .56              |
| JEa               |                   | 500     | -.045     | .30   | .059        | .002        | 500     | -.045     | .30   | .094        | .050        | 500     | -.027     | .48    | .29         | .19         | .73              |
| JEv               |                   | 505     | .005      | .91   | .052        | .000        | 505     | -.001     | .97   | .087        | .049        | 505     | -.015     | .70    | .28         | .19         | .83              |
| FDa               |                   | 513     | -.011     | .79   | .055        | .000        | 513     | .014      | .74   | .091        | .050        | 513     | .028      | .46    | .28         | .19         | .73              |
| FDv               |                   | 513     | -.025     | .56   | .056        | .001        | 513     | .000      | 1.00  | .091        | .049        | 513     | .022      | .57    | .28         | .19         | .77              |
| TORTa             |                   | 513     | .026      | .55   | .056        | .001        | 513     | .040      | .34   | .092        | .051        | 513     | .042      | .26    | .29         | .19         | .56              |
| TORTv             |                   | 513     | -.034     | .43   | .056        | .001        | 513     | -.015     | .73   | .091        | .049        | 513     | .045      | .24    | .29         | .19         | .56              |
| LDRa              |                   | 313     | .082      | .14   | .058        | .007        | 313     | .083      | .13   | .095        | .060        | 313     | .095      | .048*  | .29         | .20         | .56              |
| LDRv              |                   | 308     | -.055     | .33   | .036        | .003        | 308     | -.058     | .30   | .082        | .069        | 308     | -.067     | .17    | .31         | .23         | .56              |
| BCa               |                   | 500     | .070      | .11   | .062        | .005        | 500     | .063      | .15   | .096        | .049        | 500     | .047      | .21    | .29         | .19         | .56              |
| BCv               |                   | 505     | -.070     | .10   | .057        | .005        | 505     | -.062     | .15   | .091        | .048        | 505     | -.059     | .12    | .28         | .19         | .56              |
| Num1stBa          |                   | 513     | -.001     | .98   | .055        | .000        | 513     | .011      | .80   | .091        | .050        | 513     | .011      | .78    | .28         | .19         | .83              |
| Num1stBv          |                   | 513     | .005      | .91   | .055        | .000        | 513     | .012      | .77   | .091        | .050        | 513     | .008      | .83    | .28         | .19         | .83              |
| Speed             |                   | CRAE    | 507       | -.016 | .72         | .035        | .000    | 507       | .014  | .74         | .061        | .040    | 507       | .006   | .87         | .26         | .20              |
|                   | CRVE              | 507     | -.039     | .38   | .037        | .002        | 507     | -.017     | .69   | .061        | .039        | 507     | -.018     | .64    | .26         | .20         | .83              |
|                   | AVR               | 507     | .020      | .65   | .036        | .000        | 507     | .028      | .52   | .061        | .040        | 507     | .023      | .55    | .26         | .20         | .83              |
|                   | JEa               | 495     | -.029     | .51   | .038        | .001        | 495     | -.031     | .49   | .059        | .036        | 495     | -.014     | .72    | .27         | .21         | .83              |
|                   | JEv               | 500     | -.008     | .86   | .031        | .000        | 500     | -.018     | .69   | .055        | .039        | 500     | -.032     | .41    | .26         | .20         | .83              |
|                   | FDa               | 507     | .038      | .39   | .037        | .001        | 507     | .057      | .19   | .064        | .042        | 507     | .069      | .073†  | .26         | .20         | .55              |
|                   | FDv               | 507     | -.057     | .19   | .038        | .003        | 507     | -.042     | .34   | .062        | .038        | 507     | -.016     | .69    | .26         | .20         | .83              |
|                   | TORTa             | 507     | .009      | .84   | .035        | .000        | 507     | .019      | .65   | .061        | .040        | 507     | .021      | .59    | .26         | .20         | .83              |
|                   | TORTv             | 507     | -.066     | .13   | .039        | .004        | 507     | -.051     | .25   | .063        | .038        | 507     | .007      | .87    | .26         | .20         | .87              |
|                   | LDRa              | 312     | .022      | .69   | .028        | .001        | 507     | .025      | .65   | .061        | .057        | 507     | .028      | .57    | .26         | .20         | .83              |
|                   | LDRv              | 304     | -.13      | .020* | .038        | .018        | 304     | -.14      | .014* | .083        | .069        | 304     | -.14      | .005** | .32         | .23         | .075†            |
|                   | BCa               | 495     | .043      | .34   | .039        | .002        | 495     | .041      | .35   | .060        | .036        | 495     | .027      | .48    | .27         | .21         | .83              |
|                   | BCv               | 500     | -.045     | .31   | .033        | .002        | 500     | -.037     | .40   | .056        | .038        | 500     | -.032     | .41    | .26         | .20         | .83              |
|                   | Num1stBa          | 507     | -.019     | .67   | .035        | .000        | 507     | -.013     | .77   | .061        | .040        | 507     | -.015     | .70    | .26         | .20         | .83              |
|                   | Num1stBv          | 507     | -.044     | .31   | .037        | .002        | 507     | -.039     | .37   | .062        | .040        | 507     | -.037     | .33    | .26         | .20         | .83              |
|                   | Memory            | CRAE    | 507       | .004  | .92         | .020        | .000    | 507       | .007  | .87         | .012        | .008    | 507       | -.001  | .98         | .25         | .23              |
| CRVE              |                   | 507     | .039      | .38   | .021        | .002        | 507     | .037      | .41   | .014        | .008        | 507     | .040      | .30    | .25         | .23         | .87              |
| AVR               |                   | 507     | -.038     | .40   | .021        | .001        | 507     | -.033     | .43   | .013        | .008        | 507     | -.042     | .29    | .25         | .23         | .87              |
| JEa               |                   | 494     | -.038     | .40   | .018        | .001        | 494     | -.039     | .39   | .009        | .008        | 494     | -.020     | .62    | .25         | .24         | .87              |
| JEv               |                   | 499     | .022      | .63   | .019        | .000        | 499     | .022      | .62   | .012        | .009        | 499     | .012      | .76    | .24         | .24         | .93              |
| FDa               |                   | 507     | -.068     | .12   | .024        | .005        | 507     | -.065     | .15   | .017        | .008        | 507     | -.046     | .24    | .25         | .23         | .87              |

|              |          |     |       |        |      |      |     |       |       |       |      |     |       |       |      |      |     |
|--------------|----------|-----|-------|--------|------|------|-----|-------|-------|-------|------|-----|-------|-------|------|------|-----|
|              | FDv      | 507 | -.019 | .67    | .020 | .000 | 507 | -.012 | .79   | .013  | .008 | 507 | .019  | .64   | .25  | .23  | .87 |
|              | TORTa    | 507 | -.034 | .43    | .021 | .001 | 507 | -.034 | .44   | .014  | .008 | 507 | -.023 | .56   | .25  | .23  | .87 |
|              | TORTv    | 507 | -.071 | .11    | .025 | .005 | 507 | -.080 | .076† | .019  | .009 | 507 | -.027 | .49   | .25  | .23  | .87 |
|              | LDRa     | 310 | .042  | .46    | .010 | .002 | 310 | .041  | .47   | -.004 | .012 | 310 | .041  | .41   | .24  | .24  | .87 |
|              | LDRv     | 304 | .002  | .97    | .014 | .000 | 304 | .001  | .98   | .004  | .016 | 304 | -.004 | .94   | .19  | .19  | .98 |
|              | BCa      | 494 | -.049 | .27    | .019 | .002 | 494 | .050  | .26   | .010  | .008 | 494 | .032  | .42   | .25  | .24  | .87 |
|              | BCv      | 499 | -.040 | .37    | .021 | .002 | 499 | -.038 | .40   | .013  | .009 | 499 | -.033 | .40   | .25  | .23  | .87 |
|              | Num1stBa | 507 | -.054 | .22    | .023 | .003 | 507 | -.057 | .20   | .016  | .008 | 507 | -.061 | .12   | .25  | .23  | .87 |
| Crystallized | Num1stBv | 507 | .007  | .88    | .020 | .000 | 507 | .008  | .86   | .012  | .008 | 507 | .009  | .81   | .25  | .23  | .93 |
|              | CRAE     | 516 | .002  | .96    | .023 | .000 | 516 | .002  | .96   | .016  | .009 | 516 | .005  | .88   | .56  | .53  | .95 |
|              | CRVE     | 516 | -.016 | .71    | .023 | .000 | 516 | -.011 | .81   | .016  | .009 | 516 | -.002 | .95   | .56  | .53  | .95 |
|              | AVR      | 516 | .010  | .81    | .023 | .000 | 516 | .006  | .90   | .016  | .009 | 516 | .003  | .91   | .56  | .53  | .95 |
|              | JEa      | 503 | -.050 | .26    | .024 | .003 | 503 | -.046 | .30   | .016  | .008 | 503 | -.011 | .71   | .56  | .53  | .95 |
|              | JEv      | 508 | -.005 | .91    | .021 | .000 | 508 | -.005 | .91   | .014  | .008 | 508 | -.026 | .39   | .56  | .53  | .95 |
|              | FDa      | 516 | -.022 | .61    | .023 | .001 | 516 | -.016 | .72   | .016  | .009 | 516 | .015  | .61   | .56  | .53  | .95 |
|              | FDv      | 516 | -.037 | .40    | .024 | .001 | 516 | -.032 | .48   | .017  | .009 | 516 | .008  | .79   | .56  | .53  | .95 |
|              | TORTa    | 516 | .007  | .87    | .023 | .000 | 516 | .010  | .83   | .016  | .009 | 516 | .018  | .54   | .56  | .53  | .95 |
|              | TORTv    | 516 | -.11  | .008** | .036 | .013 | 516 | -.109 | .014* | .028  | .007 | 516 | -.016 | .60   | .56  | .52  | .95 |
|              | LDRa     | 316 | -.041 | .47    | .028 | .002 | 316 | -.042 | .45   | .029  | .026 | 316 | -.030 | .44   | .54  | .50  | .95 |
|              | LDRv     | 310 | .012  | .83    | .013 | .000 | 310 | .013  | .82   | -.005 | .008 | 310 | .006  | .88   | .52  | .51  | .95 |
|              | BCa      | 503 | .045  | .31    | .023 | .002 | 503 | .040  | .38   | .015  | .008 | 503 | .007  | .82   | .56  | .53  | .95 |
|              | BCv      | 508 | .011  | .80    | .021 | .000 | 508 | .010  | .81   | .014  | .008 | 508 | .018  | .56   | .55  | .53  | .95 |
|              | Num1stBa | 516 | -.048 | .27    | .025 | .002 | 516 | -.047 | .29   | .018  | .009 | 516 | -.044 | .14   | .56  | .53  | .95 |
| IQ change    | Num1stBv | 516 | -.008 | .85    | .023 | .000 | 516 | -.006 | .89   | .016  | .009 | 516 | -.002 | .94   | .56  | .53  | .95 |
|              | CRAE     | 514 | -.046 | .30    | .013 | .002 | 514 | -.043 | .34   | .003  | .005 | 514 | -.035 | .43   | .033 | .035 | .79 |
|              | CRVE     | 514 | -.035 | .43    | .012 | .001 | 514 | -.033 | .46   | .002  | .005 | 514 | -.031 | .47   | .033 | .036 | .79 |
|              | AVR      | 514 | -.018 | .68    | .011 | .000 | 514 | -.018 | .69   | .001  | .005 | 514 | -.011 | .80   | .032 | .036 | .88 |
|              | JEa      | 501 | -.11  | .010*  | .022 | .013 | 501 | -.11  | .012* | .012  | .006 | 501 | -.10  | .020* | .042 | .035 | .30 |
|              | JEv      | 506 | -.059 | .18    | .014 | .003 | 506 | -.057 | .20   | .003  | .005 | 506 | -.059 | .18   | .034 | .035 | .79 |
|              | FDa      | 514 | -.033 | .45    | .012 | .001 | 514 | -.030 | .50   | .002  | .005 | 514 | -.028 | .53   | .032 | .036 | .79 |
|              | FDv      | 514 | -.041 | .35    | .013 | .002 | 514 | -.037 | .41   | .002  | .005 | 514 | -.040 | .37   | .033 | .036 | .79 |
|              | TORTa    | 514 | -.006 | .88    | .011 | .000 | 514 | -.004 | .93   | .001  | .005 | 514 | -.011 | .80   | .032 | .036 | .88 |
|              | TORTv    | 514 | -.028 | .53    | .012 | .001 | 514 | -.027 | .55   | .001  | .005 | 514 | -.011 | .81   | .032 | .035 | .88 |
|              | LDRa     | 315 | -.019 | .74    | .000 | .000 | 315 | -.021 | .71   | -.012 | .014 | 315 | -.013 | .82   | .006 | .027 | .88 |
|              | LDRv     | 308 | .006  | .92    | .006 | .000 | 308 | -.002 | .97   | -.005 | .015 | 308 | .003  | .96   | .036 | .049 | .96 |
|              | BCa      | 501 | .099  | .027*  | .018 | .010 | 501 | .096  | .034* | .009  | .006 | 501 | .086  | .054† | .039 | .036 | .41 |
|              | BCv      | 506 | .038  | .39    | .012 | .001 | 506 | .038  | .40   | .002  | .005 | 506 | .035  | .43   | .032 | .035 | .79 |
|              | Num1stBa | 514 | -.049 | .27    | .013 | .002 | 514 | -.050 | .26   | .003  | .006 | 514 | -.044 | .31   | .034 | .035 | .79 |
|              | Num1stBv | 514 | -.045 | .31    | .013 | .002 | 514 | -.043 | .32   | .003  | .005 | 514 | -.046 | .29   | .034 | .036 | .79 |

Note. Visuospatial=Visuospatial ability; Speed = information processing speed; Memory = memory ability; Crystallized=Crystallized ability; G=general cognitive ability. Retinal predictor abbreviations explained in Table 1. Negative associations were such that increased retinal vascular measurements were related to lower cognitive ability scores at age 73 and lower relative change in IQ. Positive associations showed that increased retinal vascular measurements were related to higher cognitive ability scores at age 73, and increased IQ after age 11 or less decline in older age. Model 1 adjusted for age and sex; Model 2 adjusted for age, sex, hypertension, diabetes, cardiovascular history, stroke, current smoking status, APOE status, visual acuity, depression; Model 3 adjusted for adjusted for age, sex, hypertension, diabetes, cardiovascular history, stroke, current smoking status, APOE status, visual acuity, depression, age 11IQ; years of education and socioeconomic status.

<sup>a</sup> Data are presented as standardized beta coefficients ( $\beta$ ) reflecting change in cognitive domain score associated with an increase of 1 SD unit in retinal parameter.

\* Significant ( $p < .05$ )

\*\*Significant ( $p < .01$ )

† Trend ( $p < .10$ )

Supplemental Table S6. Standardised Coefficients from Multiple Linear Regressions Predicting Cognitive Ability in a subset of LBC1936 Excluding Participants with CVD

| Cognitive outcome | Retinal predictor | Model 1 |           |       |             |             | Model 2 |           |       |             |             | Model 3 |           |       |             |             |                |
|-------------------|-------------------|---------|-----------|-------|-------------|-------------|---------|-----------|-------|-------------|-------------|---------|-----------|-------|-------------|-------------|----------------|
|                   |                   | n       | $\beta^a$ | p     | Adjusted R2 | $\Delta R2$ | n       | $\beta^a$ | p     | Adjusted R2 | $\Delta R2$ | n       | $\beta^a$ | p     | Adjusted R2 | $\Delta R2$ | FDR adjusted p |
| G                 | CRAE              | 402     | .005      | .91   | .034        | .000        | 402     | .019      | .71   | .053        | .038        | 402     | -.025     | .46   | .56         | .49         | .81            |
|                   | CRVE              | 402     | .007      | .88   | .034        | .000        | 402     | .014      | .78   | .053        | .038        | 402     | .012      | .77   | .57         | .49         | .83            |
|                   | AVR               | 402     | -.004     | .94   | .034        | .000        | 402     | .003      | .96   | .053        | .038        | 402     | -.038     | .28   | .56         | .49         | .81            |
|                   | JEa               | 393     | -.042     | .40   | .039        | .002        | 393     | -.039     | .44   | .055        | .035        | 393     | -.023     | .50   | .56         | .50         | .81            |
|                   | JEv               | 396     | .004      | .93   | .030        | .000        | 396     | -.001     | .98   | .048        | .037        | 396     | -.016     | .65   | .55         | .50         | .81            |
|                   | FDa               | 402     | -.055     | .26   | .037        | .003        | 402     | -.037     | .46   | .054        | .036        | 402     | -.025     | .46   | .56         | .49         | .81            |
|                   | FDv               | 402     | -.090     | .067† | .042        | .008        | 402     | -.076     | .13   | .059        | .035        | 402     | -.020     | .56   | .56         | .49         | .81            |
|                   | TORTa             | 402     | -.023     | .64   | .035        | .001        | 402     | -.004     | .93   | .053        | .037        | 402     | -.010     | .77   | .56         | .49         | .83            |
|                   | TORTv             | 402     | -.11      | .020* | .047        | .013        | 402     | -.10      | .038* | .063        | .035        | 402     | -.017     | .63   | .56         | .48         | .81            |
|                   | LDRa              | 234     | -.030     | .64   | .028        | .001        | 234     | -.029     | .65   | .051        | .055        | 234     | .004      | .93   | .56         | .49         | .93            |
|                   | LDRv              | 246     | -.051     | .42   | .016        | .003        | 246     | -.040     | .53   | .048        | .063        | 246     | -.046     | .29   | .57         | .50         | .81            |
|                   | BCa               | 393     | .052      | .30   | .040        | .003        | 393     | .048      | .34   | .055        | .035        | 393     | .035      | .31   | .56         | .50         | .81            |
|                   | BCv               | 396     | -.019     | .70   | .031        | .000        | 396     | -.015     | .76   | .049        | .037        | 396     | -.027     | .43   | .56         | .50         | .81            |
|                   | Num1stBa          | 402     | -.053     | .28   | .037        | .003        | 402     | -.045     | .36   | .055        | .037        | 402     | -.063     | .059† | .56         | .50         | .68            |
|                   | Num1stBv          | 402     | -.063     | .20   | .038        | .004        | 402     | -.050     | .31   | .056        | .036        | 402     | -.057     | .090† | .56         | .49         | .68            |
|                   | Visuospatial      | CRAE    | 415       | -.052 | .29         | .054        | .003    | 415       | -.036 | .46         | .081        | .044    | 415       | -.064 | .13         | .31         | .22            |
| CRVE              |                   | 415     | .009      | .85   | .051        | .000        | 415     | .015      | .76   | .080        | .046        | 415     | .017      | .69   | .30         | .22         | .93            |
| AVR               |                   | 415     | -.064     | .19   | .055        | .004        | 415     | -.055     | .26   | .082        | .045        | 415     | -.084     | .049* | .31         | .23         | .44            |
| JEa               |                   | 406     | -.067     | .16   | .061        | .005        | 406     | -.064     | .19   | .085        | .042        | 406     | -.053     | .21   | .31         | .22         | .52            |
| JEv               |                   | 409     | .030      | .54   | .048        | .001        | 409     | .022      | .64   | .075        | .045        | 409     | .007      | .87   | .30         | .22         | .93            |
| FDa               |                   | 415     | -.031     | .52   | .052        | .001        | 415     | -.011     | .82   | .080        | .045        | 415     | -.001     | .99   | .30         | .22         | .99            |
| FDv               |                   | 415     | -.090     | .061† | .059        | .008        | 415     | -.072     | .14   | .084        | .042        | 415     | -.031     | .47   | .30         | .22         | .93            |
| TORTa             |                   | 415     | -.034     | .47   | .053        | .001        | 415     | -.011     | .82   | .080        | .045        | 415     | -.016     | .71   | .30         | .22         | .93            |
| TORTv             |                   | 415     | -.058     | .22   | .055        | .003        | 415     | -.045     | .35   | .081        | .044        | 415     | .016      | .71   | .30         | .22         | .93            |
| LDRa              |                   | 242     | .013      | .83   | .053        | .000        | 242     | .015      | .81   | .084        | .062        | 242     | .036      | .51   | .32         | .24         | .93            |
| LDRv              |                   | 255     | .010      | .87   | .028        | .000        | 255     | .023      | .72   | .046        | .048        | 255     | .009      | .87   | .32         | .27         | .93            |
| BCa               |                   | 406     | .091      | .061† | .064        | .008        | 416     | .085      | .080† | .088        | .041        | 416     | .077      | .068† | .31         | .22         | .44            |
| BCv               |                   | 409     | -.074     | .13   | .053        | .005        | 409     | -.067     | .16   | .079        | .044        | 409     | -.071     | .088† | .30         | .22         | .44            |
| Num1stBa          |                   | 415     | -.010     | .83   | .051        | .000        | 415     | .002      | .97   | .079        | .046        | 415     | -.012     | .77   | .30         | .22         | .93            |
| Num1stBv          |                   | 415     | -.059     | .22   | .055        | .003        | 415     | -.046     | .33   | .082        | .044        | 415     | -.052     | .21   | .31         | .22         | .52            |
| Speed             |                   | CRAE    | 412       | .000  | 1           | .026        | .000    | 412       | .017  | .72         | .061        | .053    | 412       | -.012 | .79         | .29         | .23            |
|                   | CRVE              | 412     | -.062     | .21   | .029        | .004        | 412     | -.050     | .30   | .063        | .052        | 412     | -.045     | .28   | .29         | .23         | .89            |
|                   | AVR               | 412     | .067      | .18   | .030        | .004        | 412     | .071      | .15   | .065        | .053        | 412     | .040      | .36   | .29         | .22         | .89            |
|                   | JEa               | 403     | -.032     | .52   | .029        | .001        | 403     | -.030     | .53   | .061        | .051        | 403     | -.023     | .59   | .30         | .24         | .96            |
|                   | JEv               | 406     | .033      | .51   | .023        | .001        | 406     | .023      | .64   | .056        | .051        | 406     | .013      | .76   | .29         | .23         | .98            |
|                   | FDa               | 412     | .015      | .76   | .026        | .000        | 412     | .031      | .53   | .061        | .054        | 412     | .041      | .33   | .29         | .23         | .89            |
|                   | FDv               | 412     | -.061     | .21   | .029        | .004        | 412     | -.050     | .31   | .063        | .052        | 412     | -.004     | .93   | .29         | .23         | 1              |
|                   | TORTa             | 412     | -.012     | .81   | .026        | .000        | 412     | .008      | .86   | .061        | .053        | 412     | .000      | 1     | .29         | .23         | 1              |
|                   | TORTv             | 412     | -.081     | .095† | .032        | .007        | 412     | -.065     | .18   | .065        | .050        | 412     | -.002     | .97   | .29         | .22         | 1              |
|                   | LDRa              | 242     | -.036     | .58   | .019        | .001        | 242     | -.035     | .58   | .059        | .071        | 242     | -.025     | .64   | .30         | .24         | .96            |
|                   | LDRv              | 253     | -.079     | .21   | .011        | .006        | 253     | -.075     | .23   | .069        | .087        | 253     | -.079     | .13   | .36         | .29         | .89            |
|                   | BCa               | 403     | .026      | .59   | .029        | .001        | 403     | .029      | .55   | .061        | .051        | 403     | .024      | .57   | .30         | .24         | .96            |
|                   | BCv               | 406     | -.045     | .36   | .024        | .002        | 406     | -.042     | .39   | .057        | .051        | 406     | -.051     | .23   | .29         | .23         | .89            |
|                   | Num1stBa          | 412     | -.027     | .58   | .026        | .001        | 412     | -.021     | .67   | .061        | .053        | 412     | -.032     | .45   | .29         | .23         | .96            |
|                   | Num1stBv          | 412     | -.076     | .12   | .031        | .006        | 412     | -.064     | .18   | .065        | .051        | 412     | -.065     | .12   | .29         | .23         | .89            |
|                   | Memory            | CRAE    | 408       | -.023 | .65         | .034        | .001    | 408       | -.016 | .74         | .031        | .017    | 408       | -.043 | .33         | .24         | .22            |
| CRVE              |                   | 408     | .020      | .65   | .033        | .000        | 408     | .012      | .80   | .031        | .017        | 408     | .016      | .71   | .25         | .22         | .94            |
| AVR               |                   | 408     | -.049     | .33   | .035        | .002        | 408     | -.035     | .49   | .032        | .016        | 408     | -.064     | .15   | .25         | .22         | .57            |
| JEa               |                   | 399     | -.001     | .98   | .030        | .000        | 399     | -.002     | .97   | .025        | .014        | 399     | .004      | .94   | .24         | .21         | .94            |



|              |          |     |       |        |      |      |     |       |       |       |      |     |       |       |      |      |     |
|--------------|----------|-----|-------|--------|------|------|-----|-------|-------|-------|------|-----|-------|-------|------|------|-----|
|              | JEv      | 402 | .017  | .73    | .033 | .000 | 402 | -.012 | .80   | .030  | .017 | 402 | -.003 | .94   | .24  | .21  | .94 |
|              | FDa      | 408 | -.13  | .009** | .049 | .016 | 408 | -.12  | .017* | .045  | .015 | 408 | -.11  | .013* | .26  | .21  | .19 |
|              | FDv      | 408 | -.020 | .69    | .033 | .000 | 408 | -.007 | .89   | .031  | .017 | 408 | .033  | .45   | .25  | .22  | .84 |
|              | TORTa    | 408 | -.079 | .11    | .039 | .006 | 408 | -.079 | .11   | .037  | .017 | 408 | -.078 | .074† | .25  | .22  | .37 |
|              | TORTv    | 408 | -.099 | .042*  | .043 | .010 | 408 | -.10  | .037* | .042  | .018 | 408 | -.055 | .21   | .25  | .21  | .62 |
|              | LDRa     | 238 | .053  | .42    | .013 | .003 | 238 | .039  | .55   | .010  | .031 | 238 | .050  | .39   | .24  | .22  | .84 |
|              | LDRv     | 250 | -.029 | .64    | .024 | .001 | 250 | -.013 | .84   | .020  | .028 | 250 | -.007 | .90   | .19  | .17  | .94 |
|              | BCa      | 399 | .022  | .65    | .031 | .000 | 399 | .020  | .69   | .025  | .014 | 399 | .016  | .72   | .24  | .21  | .94 |
|              | BCv      | 402 | -.024 | .63    | .033 | .001 | 402 | -.016 | .75   | .030  | .017 | 402 | -.023 | .60   | .24  | .21  | .94 |
|              | Num1stBa | 408 | -.092 | .060†  | .041 | .008 | 408 | -.082 | .094† | .038  | .015 | 408 | -.098 | .025* | .26  | .22  | .19 |
|              | Num1stBv | 408 | -.004 | .93    | .033 | .000 | 408 | .005  | .91   | .031  | .017 | 408 | .008  | .85   | .25  | .22  | .94 |
| Crystallized |          |     |       |        |      |      |     |       |       |       |      |     |       |       |      |      |     |
|              | CRAE     | 417 | .017  | .73    | .030 | .000 | 417 | .021  | .67   | .020  | .010 | 417 | -.007 | .84   | .55  | .52  | .97 |
|              | CRVE     | 417 | .008  | .87    | .029 | .000 | 417 | .010  | .84   | .020  | .009 | 417 | .020  | .54   | .55  | .52  | .86 |
|              | AVR      | 417 | .004  | .93    | .029 | .000 | 417 | .006  | .91   | .020  | .009 | 417 | -.029 | .39   | .55  | .52  | .86 |
|              | JEa      | 408 | -.041 | .40    | .032 | .002 | 408 | -.039 | .43   | .021  | .009 | 408 | -.018 | .59   | .56  | .52  | .86 |
|              | JEv      | 411 | .003  | .96    | .028 | .000 | 411 | .003  | .95   | .018  | .009 | 411 | -.016 | .63   | .55  | .52  | .86 |
|              | FDa      | 417 | -.011 | .82    | .029 | .000 | 417 | -.004 | .9    | .020  | .009 | 417 | .019  | .56   | .55  | .52  | .86 |
|              | FDv      | 417 | -.064 | .19    | .033 | .004 | 417 | -.063 | .21   | .024  | .009 | 417 | .001  | .97   | .55  | .52  | .97 |
|              | TORTa    | 417 | .017  | .73    | .030 | .000 | 417 | .019  | .70   | .020  | .010 | 417 | .020  | .54   | .55  | .52  | .86 |
|              | TORTv    | 417 | -.12  | .012*  | .044 | .015 | 417 | -.12  | .016* | .034  | .008 | 417 | -.027 | .43   | .55  | .51  | .86 |
|              | LDRa     | 244 | -.058 | .36    | .035 | .003 | 244 | -.059 | .36   | .027  | .025 | 244 | -.038 | .39   | .54  | .50  | .86 |
|              | LDRv     | 256 | .003  | .96    | .009 | .000 | 256 | .010  | .88   | -.011 | .011 | 256 | -.002 | .97   | .53  | .52  | .97 |
|              | BCa      | 408 | .022  | .66    | .030 | .000 | 408 | .019  | .70   | .020  | .009 | 408 | .005  | .89   | .56  | .53  | .97 |
|              | BCv      | 411 | .026  | .59    | .028 | .001 | 411 | .026  | .60   | .018  | .009 | 411 | .018  | .59   | .55  | .52  | .86 |
|              | Num1stBa | 417 | -.034 | .48    | .030 | .001 | 417 | -.029 | .56   | .021  | .009 | 417 | -.048 | .1    | .56  | .52  | .86 |
|              | Num1stBv | 417 | -.038 | .43    | .031 | .001 | 417 | -.031 | .53   | .021  | .009 | 417 | -.029 | .38   | .55  | .52  | .86 |
| IQ change    |          |     |       |        |      |      |     |       |       |       |      |     |       |       |      |      |     |
|              | CRAE     | 414 | -.072 | .15    | .014 | .005 | 414 | -.068 | .17   | .011  | .017 | 414 | -.070 | .16   | .03  | .029 | .36 |
|              | CRVE     | 414 | -.020 | .68    | .009 | .000 | 414 | -.013 | .79   | .007  | .017 | 414 | -.011 | .82   | .029 | .029 | .82 |
|              | AVR      | 414 | -.057 | .26    | .012 | .003 | 414 | -.060 | .23   | .010  | .018 | 414 | -.064 | .20   | .033 | .029 | .36 |
|              | JEa      | 406 | -.11  | .035*  | .018 | .011 | 406 | -.095 | .057† | .014  | .016 | 406 | -.087 | .078† | .036 | .028 | .27 |
|              | JEv      | 408 | -.057 | .25    | .012 | .003 | 408 | -.060 | .23   | .010  | .018 | 408 | -.061 | .22   | .033 | .029 | .36 |
|              | FDa      | 414 | -.071 | .15    | .014 | .005 | 414 | -.066 | .19   | .011  | .017 | 414 | -.061 | .22   | .033 | .028 | .36 |
|              | FDv      | 414 | -.11  | .023*  | .021 | .012 | 414 | -.11  | .036* | .018  | .016 | 414 | -.099 | .047* | .039 | .027 | .27 |
|              | TORTa    | 414 | -.089 | .069†  | .017 | .008 | 414 | -.083 | .092† | .014  | .016 | 414 | -.090 | .066† | .037 | .030 | .27 |
|              | TORTv    | 414 | -.062 | .21    | .012 | .004 | 414 | -.053 | .28   | .010  | .017 | 414 | -.030 | .55   | .030 | .027 | .63 |
|              | LDRa     | 243 | -.059 | .37    | .001 | .003 | 243 | -.066 | .32   | -.014 | .019 | 243 | -.064 | .33   | .004 | .030 | .45 |
|              | LDRv     | 253 | .039  | .54    | .004 | .001 | 253 | .029  | .65   | -.014 | .014 | 253 | .023  | .72   | .004 | .029 | .77 |
|              | BCa      | 406 | .11   | .035*  | .018 | .011 | 406 | .093  | .065† | .014  | .016 | 406 | .089  | .076† | .069 | .028 | .27 |
|              | BCv      | 408 | .037  | .46    | .010 | .001 | 408 | .037  | .46   | .008  | .017 | 408 | .032  | .52   | .030 | .029 | .63 |
|              | Num1stBa | 414 | -.054 | .28    | .010 | .018 | 414 | -.056 | .26   | .010  | .018 | 414 | -.052 | .29   | .032 | .028 | .44 |
|              | Num1stBv | 414 | -.072 | .14    | .014 | .005 | 414 | -.074 | .14   | .012  | .018 | 414 | -.083 | .091† | .036 | .030 | .27 |

Note. Visuospatial=Visuospatial ability; Speed = information processing speed; Memory = memory ability; Crystallized=Crystallized ability; G=general cognitive ability. Retinal predictor abbreviations explained in Table 1. Negative associations were such that increased retinal vascular measurements were related to lower cognitive ability scores at age 73, lower relative change in IQ. Positive associations showed that increased retinal vascular measurements were related to higher cognitive ability scores at age 73, and increased IQ after age 11 or less decline in older age.

Model 1 adjusted for age and sex; Model 2 adjusted for age, sex, hypertension, diabetes, stroke, current smoking status, APOE status, visual acuity, depression; Model 3 adjusted for adjusted for age, sex, hypertension, diabetes, stroke, current smoking status, APOE status, visual acuity, depression, age 11IQ; years of education and socioeconomic status.

<sup>a</sup> Data are presented as standardized beta coefficients ( $\beta$ ) reflecting change in cognitive domain score associated with an increase of 1 SD unit in retinal parameter.

\* Significant ( $p < .05$ )

\*\*Significant ( $p < .01$ )

† Trend ( $p < .01$ )

## Supplementary References

1. Wechsler, D. WMS–IIIUK administration and scoring manual. London, UK: Psychological Corporation 1998
2. Wechsler D. WAIS–IIIUK administration and scoring manual. London, UK: Psychological Corporation 1998
3. Deary IJ, Simonotto E, Meyer M, et al. The functional anatomy of inspection time: An event-related fMRI study. *Neuroimage* 2004;22:1466–1479. doi:10.1016/j.neuroimage.2004.03.047
4. Deary IJ, Der G, Ford G. Reaction times and intelligence differences: A population-based cohort study. *Intelligence* 2001;29:389–399. doi:10.1016/S0160-2896(01)00062-9
5. Nelson HE, Willison J. National Adult Reading Test (NART). London, UK: NferNelson 1991
6. Wechsler, D. Wechsler Test of Adult Reading: WTAR. New York, NY: Psychological Corporation 2001.
7. Lezak, M. Neuropsychological testing. Oxford, UK: Oxford University Press 2004
